# Supplementary material for: Coexisting multi-states in catalytic hydrogen oxidation on rhodium
Source: PubMed Central journal article supplement (PMC8586342; doi:10.1038/s41467-021-26855-y), 2021-11-11
Supplement: 41467_2021_26855_MOESM2_ESM.pdf [file 41467_2021_26855_MOESM2_ESM.pdf]

## Description of Additional Supplementary Files

File Name: Supplementary Movie 1

Description: Evolution of a surface chemical pattern on a Rh(13 9 1) domain as obtained by in situ scanning photoelectron microscopy (SPEM) during catalytic hydrogen oxidation at  $T = 453\text{ K}$ ,  $p_{\text{O}_2} = 1.1 \times 10^{-6}\text{ mbar}$  and  $p_{\text{H}_2} = 1.2 \times 10^{-6}\text{ mbar}$ . Field of view of  $41 \times 41\ \mu\text{m}^2$ .
